# Supplementary material for: Structural Elements Directing G Proteins and β-Arrestin Interactions with the Human Melatonin Type 2 Receptor Revealed by Natural Variants
Source: PubMed Central journal article supplement — ACS Pharmacol Transl Sci. 2022 Jan 25;5(2):89–101. doi: 10.1021/acsptsci.1c00239 (PMC9281605; doi:10.1021/acsptsci.1c00239), 2022-01-25
Supplement: pt1c00239_si_001.pdf [file pt1c00239_si_001.pdf]

## Supporting information:

### **Structural Elements Directing G proteins and $\beta$ -arrestin Interactions with Human Melatonin Type 2 Receptor Revealed by Natural Variants**

Bianca Plouffe<sup>1,2,7#</sup>, Angeliki Karamitri<sup>3#</sup>, Tilman Flock<sup>4,5</sup>, Jonathan M. Gallion<sup>6</sup>, Shane Houston<sup>7</sup>, Carole A. Daly<sup>7</sup>, Amélie Bonnefond<sup>8</sup>, Jean-Luc Guillaume<sup>3</sup>, Christian Le Gouill<sup>2</sup>, Phillipe Froguel<sup>8</sup>, Olivier Lichtarge<sup>6,9</sup>, Xavier Deupi<sup>4,10†\*</sup>, Ralf Jockers<sup>3†\*</sup>, Michel Bouvier<sup>1,2†\*</sup>

<sup>1</sup> Department of Biochemistry and Molecular Medicine, Université de Montréal, H3T 1J4, Montréal, QC, Canada

<sup>2</sup> Institute for Research in Immunology and Cancer, Université de Montréal, H3T 1J4, Montréal, QC, Canada

<sup>3</sup> Université de Paris, Institut Cochin, INSERM, CNRS, F-75014 PARIS, France

<sup>4</sup> Laboratory of Biomolecular Research, Department of Biology and Chemistry, Paul Scherrer Institute, 5232, Villigen, Switzerland

<sup>5</sup> Department of Biology, ETH Zürich, 8093, Zürich, Switzerland

<sup>6</sup> Program in Structural and Computational Biology and Molecular Biophysics, Baylor College of Medicine, 77030, Houston, Texas

<sup>7</sup> The Wellcome-Wolfson Institute for Experimental Medicine, Queen's University Belfast, BT9 7BL, Belfast, U.K.

<sup>8</sup> Université de Lille, Inserm/CNRS UMR 1283/8199 - EGID, Institut Pasteur de Lille, CHU de Lille, 59045, Lille, France

<sup>9</sup> Department of Molecular and Human Genetics, Baylor College of Medicine, 77030, Houston, Texas

<sup>10</sup> Condensed Matter Theory Group, Division of Scientific Computing, Theory, and Data, Paul Scherrer Institute, 5232, Villigen, Switzerland

# These authors contributed equally to this work

† Co-senior authors

\*Correspondence should be addressed to Michel Bouvier, IRIC, Université de Montréal, 2900, Boulevard Édouard-Montpetit, H3T1J4, Montréal, QC, Canada

Phone: 1-514-343-6319

E-mail: [michel.bouvier@umontreal.ca](mailto:michel.bouvier@umontreal.ca)

or Ralf Jockers, Institut Cochin, 22, Rue Mechain, 75 014, Paris, France.

Phone: +33-140516434

E-mail: [ralf.jockers@inserm.fr](mailto:ralf.jockers@inserm.fr)

or Xavier Deupi, Paul Scherrer Institute, Forschungsstrasse 111, 5232, Villigen, Switzerland.

Phone: +41-563103337

E-mail: [xavier.deupi@psi.ch](mailto:xavier.deupi@psi.ch)

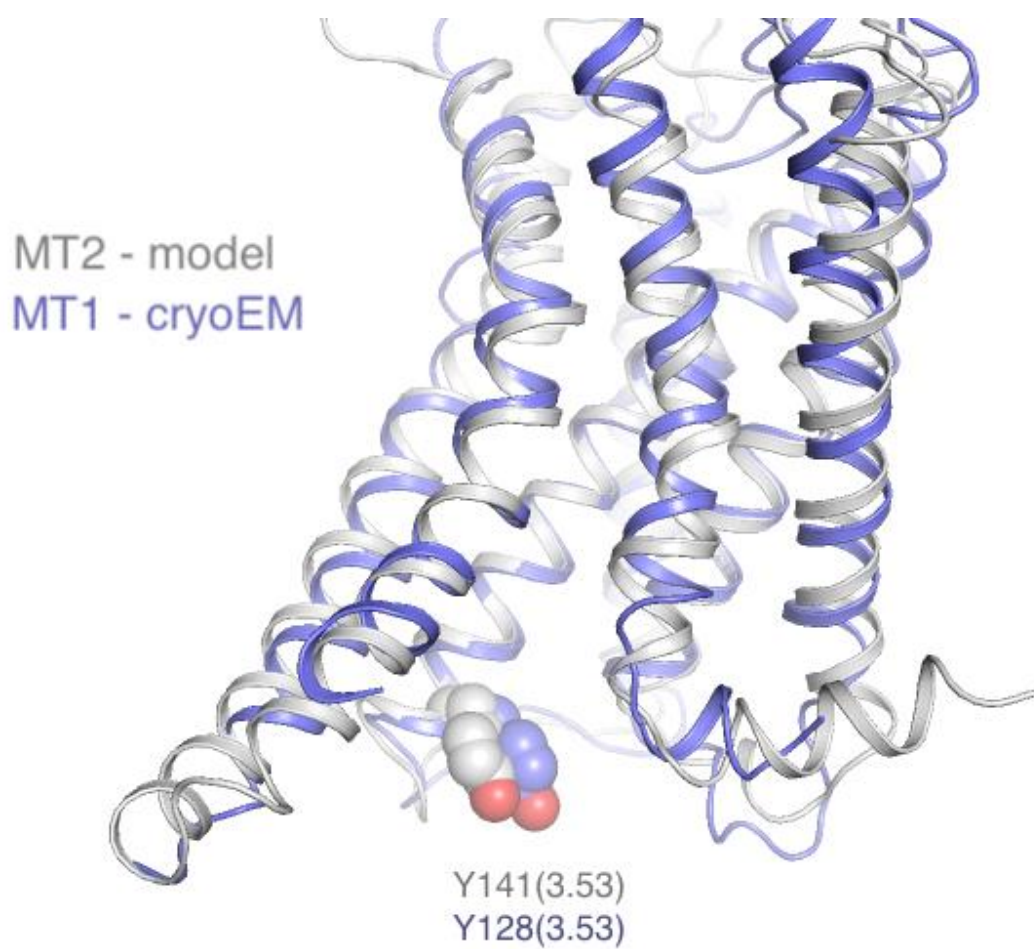

**Figure S1: Superposition of the MT2 model derived from the  $\beta$ 2AR-Gs complex and the Cryo-EM structure of the MT1-Gi complex (PDBid 7DB6). The sphere representation of Y<sup>3.53</sup> in the two structures shows identical orientations.**
